# Supplementary material for: Antibacterial and proteomic profiling of Morus alba extract against methicillin-resistant Staphylococcus aureus
Source: PeerJ. 2026 Jan 23;14:e20647. doi: 10.7717/peerj.20647 (PMC12834118; doi:10.7717/peerj.20647)
Supplement: Supplemental Information 3 [file peerj-14-20647-s003.xlsx]

## Sheet: a. SA
S. aureus to ethanol extract of Morus alba Linn. (MIC = 0.3125 mg/mL)
		CFU/mL
	Time (hr.)	control	1X	2X	4X	8X
1	0	1500000	1560000	960000	2000000	2400000
2	1	3700000	2000000	200000	2000	0
3	2	270000000	4000000	20000	100	0
4	4	560000000000	20000	1400	0	0
5	6	150000000000000	600	0	0	0
6	24	2.8e+22	700000	4000	0	0

## Sheet: b. MRSA
S. aureus MRSA to ethanol extract of Morus alba Linn. (MIC = 0.3125 mg/mL)
		CFU/mL
	Time (hr.)	control	1X	2X	4X	8X
1	0	1490000	2100000	2000000	3100000	3200000
2	1	7900000	1800000	1200000	1500000	110000
3	2	156000000	510000	400000	1200000	40000
4	4	9300000000000	800000	600000	200000	9000
5	6	94000000000000	200000	70000	200000	6000
6	24	4.4e+20	37000	28000	3000	500

## Sheet: c. EC
E. coli to ethanol extract of Morus alba Linn. (MIC = 10 mg/mL)
		CFU/mL
	Time (hr.)	control	1X	2X	4X	8X
1	0	2000000	3000000	2000000	2000000	3000000
2	1	300000	800000	700000	700000	10000
3	2	30000000	1400000	3000000	100000	7000
4	4	8000000000	1900000000	750000000	1000000	100
5	6	8000000000	33000000000	1400000000	1000000	0
6	24	17000000000000	130000000000000	7000000000000	1000000000000	0

## Sheet: d. PA
P. aeruginosa to ethanol extract of Morus alba Linn. (MIC = 20 mg/mL)
		CFU/mL
	Time (hr.)	control	1X	2X	4X	8X
1	0	650000	5000000	600000	620000	600000
2	1	2900000	4400000	500000	140000	20000
3	2	4400000	4800000	270000	200000	30
4	4	9000000000	450000000	700000	500000	0
5	6	80000000000	200000000	3300000	200000	0
6	24	4.1e+12	6200000000000	470000000	300000	0
